# Supplementary material for: The association between airflow limitation and blood eosinophil levels with treatment outcomes in patients with chronic obstructive pulmonary disease and prolonged mechanical ventilation
Source: PubMed Central journal article supplement (PMC6748958; doi:10.1038/s41598-019-49918-z), 2019-09-17
Supplement: 41598_2019_49918_MOESM1_ESM.pdf [file 41598_2019_49918_MOESM1_ESM.pdf]

## SUPPLEMENTARY INFORMATION

**TITLE:** The association between airflow limitation and blood eosinophil levels with treatment outcomes in patients with chronic obstructive pulmonary disease and prolonged mechanical ventilation

**Authors' full names:** Wei-Chang Huang MD, Chen-Cheng Huang MD, Pi-Chu Wu MD, Chao-Jung Chen MD, Ya-Hua Cheng BS, Hui-Chen Chen MD, Ching-Hsiao Lee PhD, Ming-Feng Wu PhD, Jeng-Yuan Hsu PhD

## 1 **Supplementary Methods S1- Data collection and definitions of study groups**

2 For each participant, a detailed patient record form was completed which included age,  
3 gender, body mass index, smoking history, patient source, reasons for invasive mechanical  
4 ventilation (IMV), the spirometry results within two years prior to this admission as  
5 performed and interpreted based on the American Thoracic Society statement, which defines  
6 a positive bronchodilator test as forced expiratory volume in one second or forced vital  
7 capacity improvement from a pre-dose value by  $\geq 12\%$  and  $\geq 200$  ml,<sup>1</sup> co-morbidities, and  
8 lengths of hospital stay, hospital stay before transfer to the respiratory care center (RCC) and  
9 use of IMV before transfer to the RCC. In addition, modified Glasgow Coma Scale with  
10 verbal score as one,<sup>2</sup> Acute Physiology and Chronic Health Evaluation II score, initial  
11 laboratory findings upon arrival at the RCC, the type of chronic obstructive pulmonary  
12 disease medications, rapid shallow index, the type of artificial airway, ventilator settings  
13 upon arrival at the RCC, and whether or not the participants used non-invasive positive  
14 pressure ventilation after successful liberation from IMV support during the RCC stay were  
15 also recorded. The in-RCC hospital course with the short-term treatment outcomes of interest  
16 including RCC length of stay, weaning outcomes, and death were also recorded. All patient  
17 information was anonymized and de-identified prior to analysis. All available data were  
18 analyzed after allowing for missing information, although extreme data were removed from  
19 this study.

20

## 21 **References**

- 22 1 Lung function testing: selection of reference values and interpretative strategies. American  
23 Thoracic Society. *Am. Rev. Res.p Dis.* 1991; **144**: 1202-18.
- 24 2 Huang WC, Wu PC, Chen CJ, Cheng YH, Shih SJ, Chen HC, Wu CL. High-frequency  
25 chest wall oscillation in prolonged mechanical ventilation patients: a randomized controlled

1 trial. *Clin. Respir. J.* 2016; **10**: 272-81.

2  
3 **Supplementary Methods S2- RCC weaning process and definitions of weaning outcomes**

4 All of the participants received multi-disciplinary rehabilitation treatment that included  
5 conventional chest percussion and nutritional and physiotherapy consultations for  
6 individualized nutrition formulas and exercise programs. The study unit used only one type of  
7 mechanical ventilator - the Covidien Puritan Bennett™ 840 ventilator. A respiratory  
8 therapist-implemented weaning protocol was started when the participant met all of the  
9 following criteria: causes of respiratory failure solved; no evidence of hemodynamic  
10 instability; no use of inotropic agents; systolic blood pressure >100 mmHg; heart rate < 110  
11 and > 50 bpm; body temperature < 38°C; fraction of inspired oxygen < 40%; and PEEP ≤ 8  
12 mmHg. The protocol was composed of six steps (steps 0-5), and the patients progressed one  
13 step every 24 hours from full ventilatory support (step 0) to spontaneous, unassisted breathing  
14 (step 5). Ventilator support was decreased gradually by reducing the level of pressure support  
15 ventilation with a 2-cmH<sub>2</sub>O decrement in each step, from 14 to 10 cmH<sub>2</sub>O, followed by a  
16 spontaneous T-piece breathing trial. All of these processes were only conducted during the  
17 daytime (from 8 a.m. to 6 p.m.) with full ventilator support being applied at night (from 6 p.m.  
18 to 8 a.m.). Patients were liberated from mechanical ventilatory support after passing the  
19 spontaneous T-piece breathing trial during which no indicator of weaning failure was present.

**Supplementary Table S1. Demographic and clinical characteristics of all participants and study groups categorized by respiratory care center length of stay, weaning outcomes, and mortality.**

|                              | Individuals with<br>RCC length of<br>stay > 21 days<br>(n=75) | p<br>value | Individuals<br>with failed<br>weaning (n=74) | p<br>value | Individuals<br>with death<br>(n=15) | p<br>value | Individuals with<br>any adverse<br>outcomes (n=<br>95) | p<br>value | Individuals<br>without any<br>adverse<br>outcomes (n=<br>86) | Total<br>(n=181) |
|------------------------------|---------------------------------------------------------------|------------|----------------------------------------------|------------|-------------------------------------|------------|--------------------------------------------------------|------------|--------------------------------------------------------------|------------------|
| Age (years)                  | 78.0±10.4                                                     | 0.017*     | 77.7±11.3                                    | 0.032*     | 76.4±14.0                           | 0.442      | 77.1±11.2                                              | 0.048*     | 73.5±13.1                                                    | 75.4±12.3        |
| Male gender                  | 65 (86.7%)                                                    | 0.617      | 67 (90.5%)                                   | 0.218      | 14 (93.3%)                          | 0.454      | 84 (88.4%)                                             | 0.362      | 71 (82.6%)                                                   | 155 (85.6%)      |
| BMI                          |                                                               | 0.242      |                                              | 0.272      |                                     | 0.523      |                                                        | 0.356      |                                                              |                  |
| Available number             | 73 (97.3%)                                                    |            | 73 (98.6%)                                   |            | 15 (100 %)                          |            | 93 (97.9%)                                             |            | 85 (98.8%)                                                   | 178 (98.3%)      |
| Mean±SD                      | 22.3±4.0                                                      |            | 22.4±3.6                                     |            | 22.3±3.9                            |            | 22.5±4.0                                               |            | 23.1±5.0                                                     | 22.8±4.5         |
| Smoking history              |                                                               | 0.031*     |                                              | 0.279      |                                     | 0.352      |                                                        | 0.082      |                                                              |                  |
| Never                        | 7 (9.3%)                                                      |            | 9 (12.2%)                                    |            | 1 (6.7%)                            |            | 11 (11.6%)                                             |            | 17 (19.8%)                                                   | 28 (15.5%)       |
| Ex-smoker                    | 47 (62.7%)                                                    |            | 40 (54.1%)                                   |            | 9 (60.0%)                           |            | 56 (58.9%)                                             |            | 37 (43.0%)                                                   | 93 (51.4%)       |
| Current smoker               | 21 (28.0%)                                                    |            | 25 (33.8%)                                   |            | 5 (33.3%)                           |            | 28 (29.5%)                                             |            | 32 (37.2%)                                                   | 60 (33.1%)       |
| Patient source               |                                                               | 0.002*     |                                              | 0.005*     |                                     | 0.099      |                                                        | 0.009*     |                                                              |                  |
| MICU                         | 51 (68.0%)                                                    |            | 49 (66.2%)                                   |            | 9 (60.0%)                           |            | 60 (63.2%)                                             |            | 35 (40.7%)                                                   | 95 (52.5%)       |
| SICU                         | 15 (20.0%)                                                    |            | 16 (21.6%)                                   |            | 6 (40.0%)                           |            | 23 (24.2%)                                             |            | 31 (36.0%)                                                   | 54 (29.8%)       |
| Ordinary ward                | 9 (12.0%)                                                     |            | 9 (12.2%)                                    |            | 0 (0.0%)                            |            | 12 (12.6%)                                             |            | 20 (23.3%)                                                   | 32 (17.7%)       |
| Reasons for IMV              |                                                               | 0.020*     |                                              | 0.038*     |                                     | 0.210      |                                                        | 0.015*     |                                                              |                  |
| Infectious                   | 46 (61.3%)                                                    |            | 46 (62.2%)                                   |            | 10 (66.7%)                          |            | 58 (61.1%)                                             |            | 33 (38.4%)                                                   | 91 (50.3%)       |
| Pneumonia                    | 38 (50.7%)                                                    |            | 39 (52.7%)                                   |            | 9 (60.0%)                           |            | 49 (51.6%)                                             |            | 27 (31.4%)                                                   | 76 (42.0%)       |
| Urosepsis                    | 4 (5.3%)                                                      |            | 4 (5.4%)                                     |            | 0 (0.0%)                            |            | 4 (4.2%)                                               |            | 2 (2.3%)                                                     | 6 (3.3%)         |
| Intra-abdominal<br>infection | 4 (5.3%)                                                      |            | 3 (4.1%)                                     |            | 1 (6.7%)                            |            | 5 (5.3%)                                               |            | 4 (4.7%)                                                     | 9 (5.0%)         |
| Non-infectious               | 29 (38.7%)                                                    |            | 28 (37.8%)                                   |            | 5 (33.3%)                           |            | 37 (38.9%)                                             |            | 53 (61.6%)                                                   | 90 (49.7%)       |
| Intracranial<br>hemorrhage   | 5 (6.7%)                                                      |            | 7 (9.5%)                                     |            | 2 (13.3%)                           |            | 9 (9.5%)                                               |            | 17 (19.8%)                                                   | 26 (14.4%)       |
| Ischemic stroke              | 0 (0.0%)                                                      |            | 0 (0.0%)                                     |            | 0 (0.0%)                            |            | 0 (0.0%)                                               |            | 4 (4.7%)                                                     | 4 (2.2%)         |
| Cardiac disease              | 8 (10.7%)                                                     |            | 7 (9.5%)                                     |            | 1 (6.7%)                            |            | 9 (9.5%)                                               |            | 6 (7.0%)                                                     | 15 (8.3%)        |
| Chronic lung disease         | 5 (6.7%)                                                      |            | 6 (8.1%)                                     |            | 0 (0.0%)                            |            | 7 (7.4%)                                               |            | 7 (8.1%)                                                     | 14 (7.7%)        |
| Post-operation               | 0 (0.0%)                                                      |            | 0 (0.0%)                                     |            | 0 (0.0%)                            |            | 0 (0.0%)                                               |            | 3 (3.5%)                                                     | 3 (1.7%)         |
| Neurologic disease           | 2 (2.7%)                                                      |            | 2 (2.7%)                                     |            | 0 (0.0%)                            |            | 2 (2.1%)                                               |            | 5 (5.8%)                                                     | 7 (3.9%)         |
| Malignancy                   | 3 (4.0%)                                                      |            | 2 (2.7%)                                     |            | 1 (6.7%)                            |            | 4 (4.2%)                                               |            | 3 (3.5%)                                                     | 7 (3.9%)         |
| Chronic kidney               | 3 (4.0%)                                                      |            | 2 (2.7%)                                     |            | 1 (6.7%)                            |            | 3 (3.2%)                                               |            | 0 (0.0%)                                                     | 3 (1.7%)         |

|                                                               |            |        |            |        |           |        |            |        |            |             |
|---------------------------------------------------------------|------------|--------|------------|--------|-----------|--------|------------|--------|------------|-------------|
| disease                                                       |            |        |            |        |           |        |            |        |            |             |
| Miscellaneous                                                 | 3 (4.0%)   |        | 2 (2.7%)   |        | 0 (0.0%)  |        | 3 (3.2%)   |        | 8 (9.3%)   | 11 (6.1%)   |
| Post- bronchodilator test FEV1/FVC (%)                        | 52.8±8.9   | 0.423  | 52.9±8.0   | 0.438  | 52.7±5.8  | 0.504  | 53.1±8.4   | 0.514  | 53.9±8.6   | 53.5±8.5    |
| Positive bronchodilator test <sup>&amp;</sup>                 | 14 (18.7%) | 0.419  | 15 (20.3%) | 0.287  | 0 (0.0%)  | 0.362  | 18 (18.9%) | 0.355  | 11 (12.8%) | 29 (16.0%)  |
| Airflow limitation severity (GOLD spirometric classification) |            | 0.000* |            | 0.000* |           | 0.035* |            | 0.000* |            |             |
| I                                                             | 3 (4.0%)   |        | 2 (2.7%)   |        | 1 (6.7%)  |        | 3 (3.2%)   |        | 15 (17.4%) | 18 (9.9%)   |
| II                                                            | 40 (53.3%) |        | 34 (45.9%) |        | 8 (53.3%) |        | 53 (55.8%) |        | 56 (65.1%) | 109 (60.2%) |
| III                                                           | 28 (37.3%) |        | 33 (44.6%) |        | 5 (33.3%) |        | 34 (35.8%) |        | 15 (17.4%) | 49 (27.1%)  |
| IV                                                            | 4 (5.3%)   |        | 5 (6.8%)   |        | 1 (6.7%)  |        | 5 (5.3%)   |        | 0 (0.0%)   | 5 (2.8%)    |
| Co-morbidity                                                  |            |        |            |        |           |        |            |        |            |             |
| Ischemic heart disease                                        | 25 (33.3%) | 0.111  | 22 (29.7%) | 0.272  | 4 (26.7%) | 0.735  | 29 (30.5%) | 0.193  | 18 (20.9%) | 47 (26.0%)  |
| Congestive heart failure                                      | 25 (33.3%) | 0.156  | 23 (31.1%) | 0.268  | 4 (26.7%) | 0.741  | 29 (30.5%) | 0.265  | 19 (22.1%) | 48 (26.5%)  |
| Arrythmia                                                     | 20 (26.7%) | 0.751  | 20 (27.0%) | 0.714  | 4 (26.7%) | 0.750  | 24 (25.3%) | 0.888  | 20 (23.3%) | 44 (24.3%)  |
| Chronic renal failure                                         | 28 (37.3%) | 0.021* | 25 (33.8%) | 0.067  | 7 (46.7%) | 0.043* | 33 (34.7%) | 0.037* | 17 (19.8%) | 50 (27.6%)  |
| Malignancy                                                    | 7 (9.3%)   | 0.797  | 5 (6.8%)   | 1.000  | 1 (6.7%)  | 1.000  | 8 (8.4%)   | 0.933  | 6 (7.0%)   | 14 (7.7%)   |
| Length of hospital stay (days)                                | 70.7±24.2  | 0.021* | 64.4±25.5  | 0.353  | 64.0±31.1 | 0.664  | 67.2±25.6  | 0.103  | 60.2±31.7  | 63.8±28.8   |
| Length of hospital stay before transfer to RCC (days)         | 24.8±10.2  | 0.946  | 25.1±11.4  | 0.918  | 29.3±13.2 | 0.201  | 25.1±11.2  | 0.938  | 24.9±11.8  | 25.0±11.5   |
| Total length of use of IMV (days)                             | 61.4±18.6  | 0.000* | 57.5±20.7  | 0.000* | 62.4±30.5 | 0.004* | 57.2±20.0  | 0.000* | 34.8±13.6  | 46.6±20.6   |
| Length of use of IMV before transfer to RCC (days)            | 28.2±12.6  | 0.937  | 28.3±13.2  | 0.945  | 29.4±16.2 | 0.781  | 28.3±13.3  | 0.962  | 28.4±12.2  | 28.4±12.7   |
| Modified GCS <sup>#</sup>                                     | 9.6±1.8    | 0.019* | 9.7±1.8    | 0.053  | 9.4±1.3   | 0.043* | 9.7±1.7    | 0.038* | 10.2±1.4   | 10.0±1.6    |
| APACHE II score                                               | 19.8±4.6   | 0.002* | 19.6±4.4   | 0.004* | 20.1±4.0  | 0.029* | 19.6±4.6   | 0.003* | 17.6±4.0   | 18.7±4.4    |
| Laboratory findings                                           |            |        |            |        |           |        |            |        |            |             |
| WBC (10 <sup>9</sup> /L)                                      | 11.4±4.3   | 0.002* | 12.0±4.7   | 0.000* | 12.8±5.2  | 0.029* | 11.6±4.6   | 0.000* | 9.5±3.3    | 10.6±4.2    |
| Blood eosinophil                                              | 34 (45.3%) | 1.000  | 25 (33.8%) | 0.238  | 5 (33.3%) | 0.616  | 39 (41.1%) | 0.783  | 38 (44.2%) | 77 (42.5%)  |

|                                          |                   |        |                   |        |                   |        |                   |        |                   |                   |
|------------------------------------------|-------------------|--------|-------------------|--------|-------------------|--------|-------------------|--------|-------------------|-------------------|
| percentage > 2%                          |                   |        |                   |        |                   |        |                   |        |                   |                   |
| Blood eosinophil                         | 11 (14.7%)        | 0.409  | 8 (10.8%)         | 0.130  | 1 (6.7%)          | 0.291  | 13 (13.7%)        | 0.274  | 18 (20.9%)        | 31 (17.1%)        |
| percentage > 4%                          |                   |        |                   |        |                   |        |                   |        |                   |                   |
| Blood absolute                           | 37 (49.3%)        | 0.713  | 33 (44.6%)        | 0.335  | 9 (60.0%)         | 0.852  | 45 (47.4%)        | 0.501  | 46 (53.5%)        | 91 (50.3%)        |
| eosinophil count > 150                   |                   |        |                   |        |                   |        |                   |        |                   |                   |
| cells/ $\mu$ L                           |                   |        |                   |        |                   |        |                   |        |                   |                   |
| Blood absolute                           | 20 (26.7%)        | 0.884  | 15 (20.3%)        | 0.662  | 1 (6.7%)          | 0.180  | 23 (24.2%)        | 1.000  | 21 (24.4%)        | 44 (24.3%)        |
| eosinophil count > 300                   |                   |        |                   |        |                   |        |                   |        |                   |                   |
| cells/ $\mu$ L                           |                   |        |                   |        |                   |        |                   |        |                   |                   |
| Hemoglobin (g/dL)                        | 9.8 $\pm$ 1.4     | 0.063  | 9.9 $\pm$ 1.4     | 0.098  | 9.4 $\pm$ 0.9     | 0.025* | 9.9 $\pm$ 1.4     | 0.086  | 10.2 $\pm$ 1.3    | 10.0 $\pm$ 1.4    |
| Albumin (g/dL)                           | 2.7 $\pm$ 0.5     | 0.061  | 2.7 $\pm$ 0.5     | 0.023* | 2.7 $\pm$ 0.6     | 0.200  | 2.8 $\pm$ 0.5     | 0.089  | 2.9 $\pm$ 0.4     | 2.8 $\pm$ 0.5     |
| BUN (mg/dL)                              |                   | 0.003* |                   | 0.000* |                   | 0.009* |                   | 0.000* |                   |                   |
| Available number                         | 69 (92.0%)        |        | 67 (90.5%)        |        | 13 (86.7%)        |        | 87 (91.6%)        |        | 73 (84.9%)        | 160 (88.4%)       |
| Mean $\pm$ SD                            | 49.3 $\pm$ 41.9   |        | 53.1 $\pm$ 43.1   |        | 79.5 $\pm$ 54.9   |        | 52.3 $\pm$ 42.5   |        | 32.2 $\pm$ 20.0   | 43.1 $\pm$ 35.5   |
| Creatinine (mg/dL)                       | 1.8 $\pm$ 1.7     | 0.008* | 1.7 $\pm$ 1.6     | 0.025* | 1.8 $\pm$ 1.6     | 0.143  | 1.7 $\pm$ 1.6     | 0.007* | 1.2 $\pm$ 1.0     | 1.5 $\pm$ 1.4     |
| pH                                       | 7.5 $\pm$ 0.1     | 0.068  | 7.5 $\pm$ 0.1     | 0.097  | 7.5 $\pm$ 0.0     | 0.412  | 7.5 $\pm$ 0.1     | 0.110  | 7.5 $\pm$ 0.1     | 7.5 $\pm$ 0.1     |
| PaCO <sub>2</sub> (mmHg)                 | 39.9 $\pm$ 8.9    | 0.024* | 39.4 $\pm$ 9.2    | 0.064  | 40.6 $\pm$ 11.7   | 0.254  | 39.4 $\pm$ 8.9    | 0.046* | 36.9 $\pm$ 7.8    | 38.2 $\pm$ 8.5    |
| PaO <sub>2</sub> /FiO <sub>2</sub> ratio | 289.9 $\pm$ 156.5 | 0.614  | 283.2 $\pm$ 151.9 | 0.440  | 290.0 $\pm$ 142.4 | 0.780  | 288.8 $\pm$ 152.3 | 0.554  | 302.9 $\pm$ 167.5 | 295.5 $\pm$ 159.4 |
| CHOL (mg/dL)                             |                   | 0.005* |                   | 0.001* |                   | 0.009* |                   | 0.001* |                   |                   |
| Available number                         | 73 (97.3%)        |        | 73 (98.6%)        |        | 15 (100%)         |        | 93 (97.9%)        |        | 85 (98.8%)        | 178 (98.3%)       |
| Mean $\pm$ SD                            | 122.2 $\pm$ 35.8  |        | 118.1 $\pm$ 37.2  |        | 110.6 $\pm$ 32.0  |        | 120.3 $\pm$ 36.7  |        | 139.2 $\pm$ 39.0  | 129.3 $\pm$ 38.9  |
| Prealbumin (g/L)                         |                   | 0.013* |                   | 0.003* |                   | 0.003* |                   | 0.006* |                   |                   |
| Available number                         | 74 (98.7%)        |        | 73 (98.6%)        |        | 15 (100%)         |        | 94 (98.9%)        |        | 86 (100%)         | 180 (99.4%)       |
| Mean $\pm$ SD                            | 0.1 $\pm$ 0.1     |        | 0.1 $\pm$ 0.1     |        | 0.1 $\pm$ 0.1     |        | 0.1 $\pm$ 0.1     |        | 0.2 $\pm$ 0.1     | 0.2 $\pm$ 0.1     |
| COPD medications                         |                   |        |                   |        |                   |        |                   |        |                   |                   |
| Use of systemic                          | 0 (0.0%)          | NA     | 0 (0.0%)          | NA     | 0 (0.0%)          | NA     | 0 (0.0%)          | NA     | 0 (0.0%)          | 0 (0.0%)          |
| steroids                                 |                   |        |                   |        |                   |        |                   |        |                   |                   |
| Use of short-acting                      | 75 (100%)         | NA     | 74 (100%)         | NA     | 15 (100%)         | NA     | 95 (100%)         | NA     | 86 (100%)         | 181 (100%)        |
| bronchodilators                          |                   |        |                   |        |                   |        |                   |        |                   |                   |
| RSI <sup>†</sup>                         |                   | 0.750  |                   | 0.871  |                   | 0.488  |                   | 0.853  |                   |                   |
| Available number                         | 44 (58.7%)        |        | 38 (51.4%)        |        | 5 (33.3%)         |        | 52 (54.7%)        |        | 51 (59.3%)        | 103 (56.9%)       |
| Mean $\pm$ SD                            | 166.7 $\pm$ 130.0 |        | 162.7 $\pm$ 134.0 |        | 200.4 $\pm$ 134.3 |        | 162.8 $\pm$ 126.3 |        | 158.1 $\pm$ 128.8 | 160.5 $\pm$ 127.0 |
| Artificial airway                        |                   | 0.709  |                   | 0.894  |                   | 0.998  |                   | 0.977  |                   |                   |
| Tracheostomy                             | 51 (68.0%)        |        | 49 (66.2%)        |        | 9 (60.0%)         |        | 62 (65.3%)        |        | 55 (64.0%)        | 117 (64.6%)       |
| Endotracheal tube                        | 24 (32.0%)        |        | 25 (33.8%)        |        | 6 (40.0%)         |        | 33 (34.7%)        |        | 31 (36.0%)        | 64 (35.4%)        |
| Ventilator settings                      |                   |        |                   |        |                   |        |                   |        |                   |                   |
| Mode                                     |                   | 1.000  |                   | 0.763  |                   | 0.343  |                   | 0.683  |                   |                   |

|                                                                               |            |       |            |        |            |       |            |        |            |             |
|-------------------------------------------------------------------------------|------------|-------|------------|--------|------------|-------|------------|--------|------------|-------------|
| Volume control                                                                | 54 (72.0%) |       | 55 (74.3%) |        | 13 (86.7%) |       | 71 (74.7%) |        | 61 (70.9%) | 132 (72.9%) |
| Pressure control                                                              | 21 (28.0%) |       | 19 (25.7%) |        | 2 (13.3%)  |       | 24 (25.3%) |        | 25 (29.1%) | 49 (27.1%)  |
| Tidal volume (ml/kg)                                                          | 9.7±0.7    | 0.576 | 9.7±0.7    | 0.293  | 9.9±0.5    | 0.653 | 9.7±0.7    | 0.511  | 9.8±0.6    | 9.8±0.7     |
| Respiratory rate (breaths per minute)                                         | 17.3±0.9   | 0.120 | 17.2±1.0   | 0.435  | 17.3±1.0   | 0.391 | 17.3±1.0   | 0.148  | 17.1±1.0   | 17.2±1.0    |
| Minute ventilation (liters per minute)                                        |            | 0.339 |            | 0.153  |            | 0.414 |            | 0.387  |            |             |
| Available number                                                              | 35 (46.7%) |       | 29 (39.2%) |        | 4 (26.7%)  |       | 42 (44.2%) |        | 42 (48.8%) | 84 (46.4%)  |
| Mean±SD                                                                       | 7.9±3.6    |       | 8.4±3.5    |        | 8.7±5.1    |       | 7.8±3.5    |        | 7.1±3.5    | 7.5±3.5     |
| Use of NIPPV after successful liberation from IMV support during the RCC stay | 27 (36.0%) | 0.051 | 31 (41.9%) | 0.007* | 5 (33.3%)  | 0.322 | 36 (37.9%) | 0.020* | 18 (20.9%) | 54 (29.8%)  |

\*p<0.05 when compared to Individuals without any adverse outcomes.

&Positive bronchodilator test was defined as FEV 1 or FVC improvement from pre-dose value by  $\geq 12\%$  and  $\geq 200$  mL.

#Modified GCS, verbal score as one.

※RSI was defined as the ratio of respiratory frequency to tidal volume (breaths/minute/liter).

Abbreviations: APACHE II score, Acute Physiology and Chronic Health Evaluation II score; BMI, body mass index; BUN, blood urea nitrogen; CHOL, cholesterol; COPD, chronic obstructive pulmonary disease; FEV1, forced expiratory volume in one second; FiO2, fractional inspired oxygen; FVC, forced vital capacity; GCS, Glasgow Coma Scale; GOLD, Global Initiative for Chronic Obstructive Lung Disease; IMV, invasive mechanical ventilation; MICU, medical intensive care unit; NA, not applicable; NIPPV, noninvasive positive pressure ventilation; PaCO2, partial pressure of carbon dioxide; PaO2, arterial oxygen partial pressure; RCC, respiratory care center; RSI, rapid shallow index; SD, standard deviation; SICU, surgical intensive care unit; WBC, white blood count.

**Supplementary Table S2. Simple logistic regression analysis for the significant factors associated with short-term in-RCC adverse treatment outcomes.**

| Significant factors for adverse treatment outcomes                            | All participants (n=181) |         | Participants including those with asthma and unreasonable outliers (n=187) |         |
|-------------------------------------------------------------------------------|--------------------------|---------|----------------------------------------------------------------------------|---------|
|                                                                               | Odds ratio (95% CI)      | p value | Odds ratio (95% CI)                                                        | p value |
| <b>RCC length of stay &gt;21 days</b>                                         |                          |         |                                                                            |         |
| Age: per 1-year increase                                                      | 1.03 (1.01 to 1.06)      | 0.019*  | 1.03 (1.00 to 1.06)                                                        | 0.028*  |
| Smoking: ex-smoker vs. never smoker                                           | 3.07 (1.19 to 7.90)      | 0.020*  | 3.19 (1.24 to 8.20)                                                        | 0.016*  |
| Smoking: current smoker vs. never smoker                                      | 1.62 (0.59 to 4.42)      | 0.350   | 1.54 (0.56 to 4.19)                                                        | 0.402   |
| Patient source: MICU vs. ordinary ward                                        | 2.96 (1.24 to 7.07)      | 0.014*  | 3.14 (1.33 to 7.44)                                                        | 0.009*  |
| Patient source: SICU vs. ordinary ward                                        | 0.98 (0.37 to 2.60)      | 0.972   | 1.07 (0.41 to 2.79)                                                        | 0.895   |
| Reasons for invasive mechanical ventilation:<br>Infectious vs. non-infectious | 2.15 (1.18 to 3.93)      | 0.013*  | 2.19 (1.21 to 3.97)                                                        | 0.010*  |
| Airflow limitation severity: II vs. I                                         | 2.90 (0.79 to 10.63)     | 0.108   | 2.85 (0.78 to 10.42)                                                       | 0.114   |
| Airflow limitation severity: III vs. I                                        | 6.67 (1.71 to 26.04)     | 0.006*  | 7.14 (1.84 to 27.81)                                                       | 0.005*  |
| Airflow limitation severity: IV vs. I                                         | 20.00 (1.61 to 247.98)   | 0.020*  | 20.00 (1.61 to 247.98)                                                     | 0.020*  |



|                                                     |                     |        |                     |        |
|-----------------------------------------------------|---------------------|--------|---------------------|--------|
| Chronic renal failure: yes vs. no                   | 2.28 (1.17 to 4.41) | 0.015* | 2.34 (1.22 to 4.51) | 0.011* |
| Length of hospital stay: per increase of 1 day      | 1.02 (1.00 to 1.03) | 0.011* | 1.02 (1.00 to 1.03) | 0.010* |
| Total length of use of IMV: per increase of 1 day   | 1.10 (1.07 to 1.14) | 0.000* | 1.11 (1.07 to 1.14) | 0.000* |
| Modified GCS <sup>#</sup> : per increase of 1 point | 0.79 (0.65 to 0.96) | 0.017* | 0.81 (0.67 to 0.98) | 0.029* |
| APACHE II score: per increase of 1 point            | 1.10 (1.03 to 1.18) | 0.006* | 1.10 (1.02 to 1.17) | 0.010* |
| WBC: per increase of 1000/ $\mu$ L                  | 1.00 (1.00 to 1.00) | 0.031* | 1.00 (1.00 to 1.00) | 0.037* |
| BUN: per increase of 1 mg/dL                        | 1.01 (1.00 to 1.02) | 0.063  | 1.01 (1.00 to 1.02) | 0.069  |
| Creatinine: per increase of 1 mg/dL                 | 1.33 (1.06 to 1.67) | 0.014* | 1.32 (1.06 to 1.66) | 0.015* |
| PaCO <sub>2</sub> : per increase of 1 mmHg          | 1.04 (1.00 to 1.08) | 0.028* | 1.04 (1.00 to 1.08) | 0.033* |
| CHOL: per increase of 1mg/dL                        | 0.99 (0.98 to 1.00) | 0.044* | 0.99 (0.98 to 1.00) | 0.049* |
| Prealbumin: per decrease of 0.1 g/L                 | 0.02 (0.00 to 1.49) | 0.077  | 0.06 (0.00 to 3.00) | 0.156  |

### **Failed weaning**

|                                        |                     |        |                     |        |
|----------------------------------------|---------------------|--------|---------------------|--------|
| Age: per 1-year increase               | 1.03 (1.00 to 1.06) | 0.037* | 1.03 (1.00 to 1.05) | 0.049* |
| Patient source: MICU vs. ordinary ward | 2.72 (1.14 to 6.49) | 0.024* | 2.89 (1.22 to 6.86) | 0.016* |
| Patient source: SICU vs. ordinary ward | 1.08 (0.41 to 2.83) | 0.882  | 1.16 (0.45 to 3.02) | 0.757  |

|                                                                                           |                       |        |                       |        |
|-------------------------------------------------------------------------------------------|-----------------------|--------|-----------------------|--------|
| Reasons for invasive mechanical ventilation: infectious vs. non-infectious                | 2.26 (1.23 to 4.15)   | 0.008* | 2.30 (1.27 to 4.18)   | 0.006* |
| Airflow limitation severity: II vs. I                                                     | 3.63 (0.79 to 16.66)  | 0.098  | 3.59 (0.78 to 16.46)  | 0.100  |
| Airflow limitation severity: III vs. I                                                    | 16.50 (3.38 to 80.64) | 0.001* | 17.50 (3.59 to 85.35) | 0.000* |
| Airflow limitation severity: IV vs. I                                                     | - (0.00 to -)         | 0.999  | - (0.00 to -)         | 0.999  |
| Total length of use of IMV: per increase of 1 day                                         | 1.06 (1.04 to 1.08)   | 0.000* | 1.06 (1.04 to 1.08)   | 0.000* |
| APACHE II score: per increase of 1 point                                                  | 1.08 (1.01 to 1.16)   | 0.023* | 1.08 (1.01 to 1.15)   | 0.036* |
| WBC: per increase of 1000/ $\mu$ L                                                        | 1.00 (1.00 to 1.00)   | 0.000* | 1.00 (1.00 to 1.00)   | 0.000* |
| Albumin: per increase of 1 g/dL                                                           | 0.42 (0.22 to 1.08)   | 0.060  | 0.89 (0.58 to 1.37)   | 0.592  |
| BUN: per increase of 1 mg/dL                                                              | 1.02 (1.00 to 1.03)   | 0.005* | 1.01 (1.00 to 1.03)   | 0.006* |
| Creatinine: per increase of 1 mg/dL                                                       | 1.19 (0.96 to 1.48)   | 0.109  | 1.19 (0.96 to 1.47)   | 0.116  |
| CHOL: per increase of 1mg/dL                                                              | 0.99 (0.98 to 1.00)   | 0.002* | 0.99 (0.98 to 1.00)   | 0.003* |
| Prealbumin: per increase of 1 g/L                                                         | 0.00 (0.00 to 0.13)   | 0.004* | 0.01 (0.00 to 0.31)   | 0.012* |
| Use of NIPPV after successful liberation from IMV support during the RCC stay: yes vs. no | 2.63 (1.37 to 5.06)   | 0.004* | 2.42 (1.28 to 4.57)   | 0.006* |

## Death

|                                                   |                      |        |                      |        |
|---------------------------------------------------|----------------------|--------|----------------------|--------|
| Airflow limitation severity: II vs. I             | 1.35 (0.16 to 11.46) | 0.785  | 1.30 (0.15 to 11.02) | 0.813  |
| Airflow limitation severity: III vs. I            | 1.93 (0.21 to 17.77) | 0.561  | 1.85 (0.20 to 16.98) | 0.587  |
| Airflow limitation severity: IV vs. I             | 4.25 (0.22 to 83.52) | 0.341  | 4.25 (0.22 to 83.52) | 0.341  |
| Chronic renal failure: yes vs. no                 | 2.50 (0.86 to 7.31)  | 0.094  | 2.55 (0.87 to 7.43)  | 0.087  |
| Total length of use of IMV: per increase of 1 day | 0.97 (0.95 to 0.99)  | 0.004* | 1.03 (1.01 to 1.06)  | 0.004* |
| Modified GCS#: per increase of 1 point            | 0.83 (0.63 to 1.09)  | 0.172  | 0.82 (0.63 to 1.08)  | 0.160  |
| APACHE II score: per increase of 1 point          | 1.08 (0.97 to 1.21)  | 0.180  | 1.08 (0.97 to 1.21)  | 0.164  |
| WBC: per increase of 1000/ $\mu$ L                | 1.00 (1.00 to 1.00)  | 0.036* | 1.00 (1.00 to 1.00)  | 0.033* |
| Hemoglobin: per increase of 1 g/dL                | 0.66 (0.42 to 1.04)  | 0.071  | 0.65 (0.41 to 1.03)  | 0.068  |
| BUN: per increase of 1 mg/dL                      | 1.02 (1.01 to 1.03)  | 0.001* | 1.02 (1.01 to 1.03)  | 0.001* |
| CHOL: per increase of 1mg/dL                      | 0.98 (0.96 to 1.00)  | 0.050  | 0.98 (0.97 to 1.00)  | 0.051  |
| Prealbumin: per increase of 1 g/L                 | 0.00 (0.00 to 0.08)  | 0.012* | 0.00 (0.00 to 0.00)  | 0.012* |

## Any adverse outcomes

|                                                                            |                       |        |                       |        |
|----------------------------------------------------------------------------|-----------------------|--------|-----------------------|--------|
| Age: per 1-year increase                                                   | 1.03 (1.00 to 1.05)   | 0.051  | 1.02 (1.00 to 1.05)   | 0.070  |
| Patient source: MICU vs. ordinary ward                                     | 2.86 (1.25 to 6.54)   | 0.013* | 3.01 (1.33 to 6.84)   | 0.008* |
| Patient source: SICU vs. ordinary ward                                     | 1.24 (0.51 to 3.03)   | 0.642  | 1.31 (0.54 to 3.18)   | 0.547  |
| Reasons for invasive mechanical ventilation: infectious vs. non-infectious | 2.52 (1.38 to 4.58)   | 0.003* | 2.55 (1.42 to 4.61)   | 0.002* |
| Airflow limitation severity: II vs. I                                      | 4.73 (1.30 to 17.28)  | 0.019* | 4.58 (1.26 to 16.68)  | 0.021* |
| Airflow limitation severity: III vs. I                                     | 11.33 (2.85 to 45.07) | 0.001* | 12.00 (3.02 to 47.61) | 0.000* |
| Airflow limitation severity: IV vs. I                                      | - (0.00 to -)         | 0.999  | - (0.00 to -)         | 0.999  |
| Chronic renal failure: yes vs. no                                          | 2.16 (1.10 to 4.26)   | 0.026* | 2.25 (1.15 to 4.41)   | 0.018* |
| Total length of use of IMV: per increase of 1 day                          | 1.09 (1.06 to 1.12)   | 0.000* | 1.10 (1.07 to 1.13)   | 0.000* |
| Modified GCS#: per increase of 1 point                                     | 0.81 (0.66 to 1.01)   | 0.054  | 0.83 (0.68 to 1.01)   | 0.067  |
| APACHE II score: per increase of 1 point                                   | 1.11 (1.03 to 1.19)   | 0.004* | 1.10 (1.03 to 1.18)   | 0.007* |
| WBC: per increase of 1000/ $\mu$ L                                         | 1.00 (1.00 to 1.00)   | 0.001* | 1.00 (1.00 to 1.00)   | 0.001* |
| BUN: per increase of 1 mg/dL                                               | 1.02 (1.01 to 1.04)   | 0.001* | 1.02 (1.01 to 1.04)   | 0.001* |
| Creatinine: per increase of 1 mg/dL                                        | 1.38 (1.08 to 1.77)   | 0.011* | 1.38 (1.08 to 1.77)   | 0.011* |
| PaCO <sub>2</sub> : per increase of 1 mmHg                                 | 1.04 (1.01 to 1.08)   | 0.053  | 1.04 (1.00 to 1.07)   | 0.053  |

|                                                                                           |                     |        |                     |        |
|-------------------------------------------------------------------------------------------|---------------------|--------|---------------------|--------|
| CHOL: per increase of 1mg/dL                                                              | 0.99 (0.98 to 1.00) | 0.002* | 0.99 (0.98 to 1.00) | 0.003* |
| Prealbumin: per increase of 1 g/L                                                         | 0.00 (0.00 to 0.22) | 0.007* | 0.01 (0.00 to 0.47) | 0.020* |
| Use of NIPPV after successful liberation from IMV support during the RCC stay: yes vs. no | 2.31 (1.19 to 4.48) | 0.014* | 2.09 (1.10 to 3.98) | 0.025* |

---

\*Statistically significant (p<0.05).

#Modified GCS, verbal score as one.

Abbreviations: CI, confidence interval; vs., versus; also see Supplementary Table S1.

**Supplementary Table S3. Multiple logistic regression analysis for the independent factors associated with short-term in-RCC adverse treatment outcomes.**

| Significant factors for adverse treatment outcomes | All participants (n=181) |         | Participants including those with asthma and unreasonable outliers (n=187) |         |
|----------------------------------------------------|--------------------------|---------|----------------------------------------------------------------------------|---------|
|                                                    | Odds ratio (95% CI)      | p value | Odds ratio (95% CI)                                                        | p value |
| <b>RCC length of stay &gt;21 days</b>              |                          |         |                                                                            |         |
| Patient source: MICU vs. ordinary ward             | 11.94 (3.16 to 45.15)    | 0.000*  | 15.47 (3.94 to 60.76)                                                      | 0.000*  |
| Patient source: SICU vs. ordinary ward             | 2.57 (0.65 to 10.18)     | 0.180   | 4.17 (0.93 to 16.94)                                                       | 0.056   |
| Total length of use of IMV: per increase of 1 day  | 1.13 (1.09 to 1.17)      | 0.000*  | 1.13 (1.09 to 1.18)                                                        | 0.000*  |
| PaCO <sub>2</sub> : per increase of 1 mmHg         | 1.07 (1.01 to 1.14)      | 0.015*  | 1.07 (1.02 to 1.14)                                                        | 0.013*  |
| <b>Failed weaning</b>                              |                          |         |                                                                            |         |
| Airflow limitation severity: II vs. I              | 3.21 (0.60 to 17.32)     | 0.174   | 4.21 (0.75 to 23.59)                                                       | 0.102   |
| Airflow limitation severity: III vs. I             | 15.06 (2.53 to 89.63)    | 0.003*  | 22.88 (3.65 to 143.59)                                                     | 0.001*  |
| Total length of use of IMV: per increase of 1 day  | 1.05 (1.03 to 1.08)      | 0.000*  | 1.05 (1.03 to 1.08)                                                        | 0.000*  |
| BUN: per increase of 1 mg/dL                       | 1.01 (1.00 to 1.03)      | 0.046*  | 1.01 (1.00 to 1.03)                                                        | 0.047*  |

|                              |                     |        |                     |        |
|------------------------------|---------------------|--------|---------------------|--------|
| CHOL: per increase of 1mg/dL | 0.98 (0.97 to 1.00) | 0.008* | 0.99 (0.98 to 1.00) | 0.030* |
|------------------------------|---------------------|--------|---------------------|--------|

**Death**

|                                                   |                     |       |                     |       |
|---------------------------------------------------|---------------------|-------|---------------------|-------|
| Total length of use of IMV: per increase of 1 day | 1.03 (1.00 to 1.05) | 0.058 | 1.03 (1.00 to 1.06) | 0.056 |
|---------------------------------------------------|---------------------|-------|---------------------|-------|

|                              |                     |        |                     |        |
|------------------------------|---------------------|--------|---------------------|--------|
| BUN: per increase of 1 mg/dL | 1.02 (1.01 to 1.04) | 0.002* | 1.02 (1.01 to 1.04) | 0.001* |
|------------------------------|---------------------|--------|---------------------|--------|

**Any adverse outcomes**

|                                        |                       |        |                       |        |
|----------------------------------------|-----------------------|--------|-----------------------|--------|
| Patient source: MICU vs. ordinary ward | 11.62 (2.85 to 47.38) | 0.001* | 12.33 (3.04 to 50.03) | 0.000* |
|----------------------------------------|-----------------------|--------|-----------------------|--------|

|                                        |                      |        |                      |        |
|----------------------------------------|----------------------|--------|----------------------|--------|
| Patient source: SICU vs. ordinary ward | 6.46 (1.46 to 28.55) | 0.014* | 6.62 (1.52 to 28.72) | 0.012* |
|----------------------------------------|----------------------|--------|----------------------|--------|

|                                       |                        |        |                        |        |
|---------------------------------------|------------------------|--------|------------------------|--------|
| Airflow limitation severity: II vs. I | 17.66 (2.87 to 108.58) | 0.002* | 17.70 (2.84 to 110.34) | 0.002* |
|---------------------------------------|------------------------|--------|------------------------|--------|

|                                        |                        |        |                        |        |
|----------------------------------------|------------------------|--------|------------------------|--------|
| Airflow limitation severity: III vs. I | 37.07 (5.04 to 272.39) | 0.000* | 42.85 (5.76 to 318.63) | 0.000* |
|----------------------------------------|------------------------|--------|------------------------|--------|

|                                                   |                     |        |                     |        |
|---------------------------------------------------|---------------------|--------|---------------------|--------|
| Total length of use of IMV: per increase of 1 day | 1.11 (1.07 to 1.15) | 0.000* | 1.11 (1.07 to 1.16) | 0.000* |
|---------------------------------------------------|---------------------|--------|---------------------|--------|

|                              |                     |        |                     |        |
|------------------------------|---------------------|--------|---------------------|--------|
| BUN: per increase of 1 mg/dL | 1.03 (1.01 to 1.05) | 0.008* | 1.03 (1.01 to 1.05) | 0.005* |
|------------------------------|---------------------|--------|---------------------|--------|

---

\*Statistically significant (p<0.05).

Abbreviations: see Supplementary Tables S1 and S2.

**Supplementary Table S4. Associations between airflow limitation severity and blood eosinophil levels with short-term in-RCC adverse outcomes for all participants.**

|                                                                  | Individuals with<br>RCC length of stay<br>> 21 days (n=75) | p<br>value | Individuals with<br>failed weaning<br>(n=74) | p<br>value | Individuals<br>with death<br>(n=15) | p<br>value | Individuals with<br>any adverse<br>outcomes (n= 95) | p<br>value | Individuals<br>without any<br>adverse outcomes<br>(n= 86) | Total<br>(n=181) |
|------------------------------------------------------------------|------------------------------------------------------------|------------|----------------------------------------------|------------|-------------------------------------|------------|-----------------------------------------------------|------------|-----------------------------------------------------------|------------------|
| <b>Airflow limitation severity</b>                               |                                                            |            |                                              |            |                                     |            |                                                     |            |                                                           |                  |
| Post- bronchodilator test FEV1 % predicted                       | 53.4 ± 15.1                                                | 0.000*     | 49.8 ± 13.6                                  | 0.000*     | 50.7 ± 14.1                         | 0.003*     | 52.8 ± 14.0                                         | 0.000*     | 63.0 ± 14.6                                               | 57.7 ± 15.1      |
| <b>Blood eosinophil levels</b>                                   |                                                            |            |                                              |            |                                     |            |                                                     |            |                                                           |                  |
| Blood eosinophil percentage (%)                                  | 2.4 ± 2.9                                                  | 0.626      | 1.9 ± 2.9                                    | 0.147      | 1.5 ± 1.4                           | 0.130      | 2.2 ± 3.0                                           | 0.406      | 2.6 ± 2.8                                                 | 2.4 ± 2.9        |
| Blood absolute eosinophil count (cells/μL)                       | 248.3 ± 293.7                                              | 0.713      | 197.8 ± 237.0                                | 0.418      | 165.9 ± 139.7                       | 0.380      | 228.9 ± 283.7                                       | 0.949      | 2321.5 ± 281.2                                            | 230.1 ± 281.8    |
| Blood eosinophil percentage >3%                                  | 19 (25.3%)                                                 | 0.607      | 13 (17.6%)                                   | 0.094      | 1 (6.7%)                            | 0.064      | 21 (22.1%)                                          | 0.282      | 26 (30.2%)                                                | 47 (26.0%)       |
| Blood absolute eosinophil count >200 cells/μL                    | 34 (45.3%)                                                 | 0.892      | 28 (37.8%)                                   | 0.614      | 7 (46.7%)                           | 1.000      | 40 (42.1%)                                          | 1.000      | 37 (43.0%)                                                | 77 (42.5%)       |
| Blood absolute eosinophil count >400 cells/μL                    | 16 (21.3%)                                                 | 0.217      | 11 (14.9%)                                   | 0.881      | 1 (6.7%)                            | 0.688      | 17 (17.9%)                                          | 0.458      | 11 (12.8%)                                                | 28 (15.5%)       |
| Blood eosinophil percentage > 2% or absolute count >200 cells/μL | 38 (50.7%)                                                 | 0.825      | 30 (40.5%)                                   | 0.456      | 7 (46.7%)                           | 1.000      | 44 (46.3%)                                          | 0.973      | 41 (47.7%)                                                | 85 (47.0%)       |
| Blood eosinophil percentage >3% or absolute count >300 cells/μL  | 23 (30.7%)                                                 | 0.580      | 16 (21.6%)                                   | 0.068      | 2 (13.3%)                           | 0.134      | 26 (27.4%)                                          | 0.274      | 31 (36.0%)                                                | 57 (31.5%)       |
| Blood eosinophil percentage >4% or                               | 18 (24.0%)                                                 | 1.000      | 14 (18.9%)                                   | 0.635      | 2 (13.3%)                           | 0.513      | 20 (21.1%)                                          | 0.859      | 20 (23.3%)                                                | 40 (22.1%)       |



absolute count >400  
cells/ $\mu$ L

---

\*p<0.05 when compared to Individuals without any adverse outcomes.  
Abbreviations: see Supplementary Table S1.

**Supplementary Table S5. Demographic and clinical characteristics of participants including those with asthma and unreasonable outliers and study groups categorized by respiratory care center length of stay, weaning outcomes, and mortality.**

|                              | Individuals with<br>RCC length of<br>stay > 21 days<br>(n=78) | p<br>value | Individuals<br>with failed<br>weaning (n=77) | p<br>value | Individuals<br>with death<br>(n=15) | p<br>value | Individuals with<br>any adverse<br>outcomes (n=<br>98) | p<br>value | Individuals<br>without any<br>adverse<br>outcomes (n=<br>89) | Total<br>(n=187) |
|------------------------------|---------------------------------------------------------------|------------|----------------------------------------------|------------|-------------------------------------|------------|--------------------------------------------------------|------------|--------------------------------------------------------------|------------------|
| Age (years)                  | 77.9±10.5                                                     | 0.029*     | 77.6±11.3                                    | 0.047*     | 76.4±14.0                           | 0.478      | 77.0±11.3                                              | 0.049*     | 73.8±13.1                                                    | 75.5±12.2        |
| Male gender                  | 68 (87.2%)                                                    | 0.609      | 70 (90.9%)                                   | 0.214      | 14 (93.3%)                          | 0.457      | 87 (88.8%)                                             | 0.368      | 74 (83.1%)                                                   | 161 (86.1%)      |
| BMI                          |                                                               | 0.247      |                                              | 0.276      |                                     | 0.570      |                                                        | 0.374      |                                                              |                  |
| Available<br>number          | 76 (97.4%)                                                    |            | 76 (98.7%)                                   |            | 15 (100 %)                          |            | 96 (98.0%)                                             |            | 88 (98.9%)                                                   | 184 (98.4%)      |
| Mean±SD                      | 22.2±4.0                                                      |            | 22.3±3.6                                     |            | 22.3±3.9                            |            | 22.4±4.0                                               |            | 23.0±4.9                                                     | 22.7±4.5         |
| Smoking history              |                                                               | 0.017*     |                                              | 0.193      |                                     | 0.354      |                                                        | 0.051      |                                                              |                  |
| Never                        | 7 (9.0%)                                                      |            | 9 (11.7%)                                    |            | 1 (6.7%)                            |            | 11 (11.2%)                                             |            | 17 (19.1%)                                                   | 28 (15.0%)       |
| Ex-smoker                    | 50 (64.1%)                                                    |            | 43 (55.8%)                                   |            | 9 (60.0%)                           |            | 59 (60.2%)                                             |            | 38 (42.7%)                                                   | 97 (51.9%)       |
| Current<br>smoker            | 21 (26.9%)                                                    |            | 25 (32.5%)                                   |            | 5 (33.3%)                           |            | 28 (28.6%)                                             |            | 34 (38.2%)                                                   | 62 (33.2%)       |
| Patient source               |                                                               | 0.002*     |                                              | 0.004*     |                                     | 0.094      |                                                        | 0.006*     |                                                              |                  |
| MICU                         | 53 (67.9%)                                                    |            | 51 (66.2%)                                   |            | 9 (60.0%)                           |            | 62 (63.3%)                                             |            | 36 (40.4%)                                                   | 98 (52.4%)       |
| SICU                         | 16 (20.5%)                                                    |            | 17 (22.1%)                                   |            | 6 (40.0%)                           |            | 24 (24.5%)                                             |            | 32 (36.0%)                                                   | 56 (29.9%)       |
| Ordinary ward                | 9 (11.5%)                                                     |            | 9 (11.7%)                                    |            | 0 (0.0%)                            |            | 12 (12.2%)                                             |            | 21 (23.6%)                                                   | 33 (17.6%)       |
| Reasons for IMV              |                                                               | 0.018*     |                                              | 0.033*     |                                     | 0.200      |                                                        | 0.015*     |                                                              |                  |
| Infectious                   | 48 (61.5%)                                                    |            | 48 (62.3%)                                   |            | 10 (66.7%)                          |            | 60 (61.2%)                                             |            | 34 (38.2%)                                                   | 94 (50.3%)       |
| Pneumonia                    | 40 (51.3%)                                                    |            | 41 (53.2%)                                   |            | 9 (60.0%)                           |            | 51 (52.0%)                                             |            | 27 (30.3%)                                                   | 78 (41.7%)       |
| Urosepsis                    | 4 (5.1%)                                                      |            | 4 (5.2%)                                     |            | 0 (0.0%)                            |            | 4 (4.1%)                                               |            | 2 (2.2%)                                                     | 6 (3.2%)         |
| Intra-abdominal<br>infection | 4 (5.1%)                                                      |            | 3 (3.9%)                                     |            | 1 (6.7%)                            |            | 5 (5.1%)                                               |            | 5 (5.6%)                                                     | 10 (5.3%)        |
| Non-infectious               | 30 (38.5%)                                                    |            | 29 (37.7%)                                   |            | 5 (33.3%)                           |            | 38 (38.8%)                                             |            | 55 (61.8%)                                                   | 93 (49.7%)       |
| Intracranial<br>hemorrhage   | 5 (6.4%)                                                      |            | 7 (9.1%)                                     |            | 2 (13.3%)                           |            | 9 (9.2%)                                               |            | 17 (19.1%)                                                   | 26 (13.9%)       |
| Ischemic stroke              | 0 (0.0%)                                                      |            | 0 (0.0%)                                     |            | 0 (0.0%)                            |            | 0 (0.0%)                                               |            | 4 (4.5%)                                                     | 4 (2.1%)         |
| Cardiac disease              | 8 (10.3%)                                                     |            | 7 (9.1%)                                     |            | 1 (6.7%)                            |            | 9 (9.2%)                                               |            | 6 (6.7%)                                                     | 15 (8.0%)        |
| Chronic lung disease         | 5 (6.4%)                                                      |            | 6 (7.8%)                                     |            | 0 (0.0%)                            |            | 7 (7.1%)                                               |            | 8 (9.0%)                                                     | 15 (8.0%)        |
| Post-operation               | 0 (0.0%)                                                      |            | 0 (0.0%)                                     |            | 0 (0.0%)                            |            | 0 (0.0%)                                               |            | 3 (3.4%)                                                     | 3 (1.6%)         |

|                                                               |            |        |            |        |           |        |            |        |            |             |
|---------------------------------------------------------------|------------|--------|------------|--------|-----------|--------|------------|--------|------------|-------------|
| Neurologic disease                                            | 2 (2.6%)   |        | 2 (2.6%)   |        | 0 (0.0%)  |        | 2 (2.0%)   |        | 5 (5.6%)   | 7 (3.7%)    |
| Malignancy                                                    | 3 (3.8%)   |        | 2 (2.6%)   |        | 1 (6.7%)  |        | 4 (4.1%)   |        | 4 (4.5%)   | 8 (4.3%)    |
| Chronic kidney disease                                        | 3 (3.8%)   |        | 2 (2.6%)   |        | 1 (6.7%)  |        | 3 (3.1%)   |        | 0 (0.0%)   | 3 (1.6%)    |
| Miscellaneous                                                 | 4 (5.1%)   |        | 3 (3.9%)   |        | 0 (0.0%)  |        | 4 (4.1%)   |        | 8 (9.0%)   | 12 (6.4%)   |
| Post- bronchodilator test FEV1/FVC (%)                        | 53.1±8.9   | 0.523  | 53.2±8.1   | 0.546  | 52.7±5.8  | 0.485  | 53.3±8.5   | 0.600  | 54.0±8.5   | 53.6±8.4    |
| Post- bronchodilator test FEV1 % predicted                    | 52.9±15.0  | 0.000* | 49.5±13.5  | 0.000* | 50.7±14.1 | 0.003* | 52.5±14.0  | 0.000* | 63.0±14.5  | 57.5±15.1   |
| Positive bronchodilator test <sup>&amp;</sup>                 | 14 (17.9%) | 0.562  | 15 (19.5%) | 0.405  | 0 (0.0%)  | 0.207  | 18 (18.4%) | 0.478  | 12 (13.5%) | 30 (16.0%)  |
| Airflow limitation severity (GOLD spirometric classification) |            | 0.000* |            | 0.000* |           | 0.030* |            | 0.000* |            |             |
| I                                                             | 3 (3.8%)   |        | 2 (2.6%)   |        | 1 (6.7%)  |        | 3 (3.1%)   |        | 15 (16.9%) | 18 (9.6%)   |
| II                                                            | 41 (52.6%) |        | 35 (45.5%) |        | 8 (53.3%) |        | 54 (55.1%) |        | 59 (66.3%) | 113 (60.4%) |
| III                                                           | 30 (38.5%) |        | 35 (45.5%) |        | 5 (33.3%) |        | 36 (36.7%) |        | 15 (16.9%) | 51 (27.3%)  |
| IV                                                            | 4 (5.1%)   |        | 5 (6.5%)   |        | 1 (6.7%)  |        | 5 (5.1%)   |        | 0 (0.0%)   | 5 (2.7%)    |
| Co-morbidity                                                  |            |        |            |        |           |        |            |        |            |             |
| Asthma                                                        | 2 (2.6%)   | 1.000  | 2 (2.6%)   | 1.000  | 0 (0.0%)  | 1.000  | 2 (2.0%)   | 1.000  | 2 (2.2%)   | 4 (2.1%)    |
| Ischemic heart disease                                        | 25 (32.1%) | 0.117  | 22 (28.6%) | 0.284  | 4 (26.7%) | 0.517  | 29 (29.6%) | 0.192  | 18 (20.2%) | 47 (25.1%)  |
| Congestive heart failure                                      | 26 (33.3%) | 0.163  | 24 (31.2%) | 0.276  | 4 (26.7%) | 0.744  | 30 (30.6%) | 0.275  | 20 (22.5%) | 50 (26.7%)  |
| Arrhythmia                                                    | 21 (26.9%) | 0.627  | 21 (27.3%) | 0.593  | 4 (26.7%) | 0.744  | 25 (25.5%) | 0.753  | 20 (22.5%) | 45 (24.1%)  |
| Chronic renal failure                                         | 29 (37.2%) | 0.015* | 26 (33.8%) | 0.051  | 7 (46.7%) | 0.041* | 34 (34.7%) | 0.026* | 17 (19.1%) | 51 (27.3%)  |
| Malignancy                                                    | 7 (9.0%)   | 1.000  | 5 (6.5%)   | 0.968  | 1 (6.7%)  | 1.000  | 8 (8.2%)   | 1.000  | 7 (7.9%)   | 15 (8.0%)   |
| Length of hospital stay (days)                                | 70.1±23.9  | 0.018* | 64.1±25.1  | 0.323  | 64.0±31.1 | 0.626  | 66.8±25.3  | 0.088  | 59.7±31.2  | 63.5±28.4   |
| Length of hospital stay before transfer to RCC (days)         | 24.7±10.2  | 0.843  | 25.0±11.4  | 0.982  | 29.3±13.2 | 0.210  | 25.0±11.2  | 0.963  | 25.1±11.7  | 25.0±11.4   |
| Total length of use of IMV (days)                             | 61.2±18.3  | 0.000* | 57.5±20.4  | 0.000* | 62.4±30.5 | 0.004* | 57.2±19.8  | 0.000* | 30.1±13.5  | 46.7±20.3   |
| Length of use of IMV before transfer to RCC (days)            | 28.0±12.6  | 0.839  | 28.1±13.1  | 0.848  | 29.4±16.2 | 0.784  | 28.1±13.2  | 0.878  | 28.4±12.0  | 28.3±12.6   |
| Modified GCS <sup>#</sup>                                     | 9.7±1.8    | 0.033* | 9.8±1.8    | 0.088  | 9.4±1.3   | 0.047* | 9.8±1.7    | 0.048* | 10.2±1.4   | 10.0±1.6    |

|                                                                   |             |        |             |        |             |        |             |        |             |             |
|-------------------------------------------------------------------|-------------|--------|-------------|--------|-------------|--------|-------------|--------|-------------|-------------|
| APACHE II score                                                   | 19.6±4.6    | 0.004* | 19.4±4.4    | 0.008* | 20.1±4.0    | 0.029* | 19.5±4.6    | 0.005* | 17.7±4.0    | 18.6±4.4    |
| Laboratory findings                                               |             |        |             |        |             |        |             |        |             |             |
| WBC (10 <sup>9</sup> /L)                                          | 11.4±4.2    | 0.002* | 11.9±4.7    | 0.000* | 12.8±5.2    | 0.030* | 11.6±4.5    | 0.000* | 9.5±3.3     | 10.6±4.1    |
| Blood eosinophil percentage (%)                                   | 2.4±3.0     | 0.752  | 2.0±2.9     | 0.211  | 1.5±1.4     | 0.142  | 2.3±3.0     | 0.510  | 2.5±2.8     | 2.4±2.9     |
| Blood absolute eosinophil count (cells/μL)                        | 248.0±293.8 | 0.645  | 199.5±239.7 | 0.490  | 165.9±139.7 | 0.402  | 229.2±284.1 | 0.968  | 227.6±277.4 | 228.4±280.2 |
| Blood eosinophil percentage > 2%                                  | 35 (44.9%)  | 1.000  | 26 (33.8%)  | 0.244  | 5 (33.3%)   | 0.633  | 40 (40.8%)  | 0.789  | 39 (43.8%)  | 79 (42.2%)  |
| Blood eosinophil percentage > 3%                                  | 20 (25.6%)  | 0.732  | 14 (18.2%)  | 0.140  | 1 (6.7%)    | 0.108  | 22 (22.4%)  | 0.373  | 26 (29.2%)  | 48 (25.7%)  |
| Blood eosinophil percentage > 4%                                  | 12 (15.4%)  | 0.541  | 9 (11.7%)   | 0.202  | 1 (6.7%)    | 0.295  | 14 (14.3%)  | 0.377  | 18 (20.2%)  | 32 (17.1%)  |
| Blood absolute eosinophil count > 150 cells/μL                    | 38 (48.7%)  | 0.710  | 34 (44.2%)  | 0.339  | 9 (60.0%)   | 0.813  | 46 (46.9%)  | 0.512  | 47 (52.8%)  | 93 (49.7%)  |
| Blood absolute eosinophil count > 200 cells/μL                    | 35 (44.9%)  | 0.785  | 29 (37.7%)  | 0.723  | 7 (46.7%)   | 0.931  | 41 (41.8%)  | 1.000  | 37 (41.6%)  | 78 (41.7%)  |
| Blood absolute eosinophil count > 300 cells/μL                    | 21 (26.9%)  | 0.752  | 16 (20.8%)  | 0.804  | 1 (6.7%)    | 0.184  | 24 (24.5%)  | 1.000  | 21 (23.6%)  | 45 (24.1%)  |
| Blood absolute eosinophil count > 400 cells/μL                    | 17 (21.8%)  | 0.155  | 12 (15.6%)  | 0.708  | 1 (6.7%)    | 1.000  | 18 (18.4%)  | 0.352  | 11 (12.4%)  | 29 (15.5%)  |
| Blood eosinophil percentage > 2% or absolute count > 200 cells/μL | 39 (50.0%)  | 0.836  | 31 (40.3%)  | 0.459  | 7 (46.7%)   | 1.000  | 45 (45.9%)  | 0.978  | 42 (47.2%)  | 87 (46.5%)  |
| Blood eosinophil percentage > 3% or absolute count > 300 cells/μL | 24 (30.8%)  | 0.695  | 17 (22.1%)  | 0.102  | 2 (13.3%)   | 0.136  | 27 (27.6%)  | 0.359  | 31 (34.8%)  | 58 (31.0%)  |
| Blood eosinophil percentage > 4% or absolute count > 400 cells/μL | 19 (24.4%)  | 0.917  | 15 (19.5%)  | 0.779  | 2 (13.3%)   | 0.733  | 21 (21.4%)  | 1.000  | 20 (22.5%)  | 41 (21.9%)  |

|                                        |             |        |             |        |             |        |             |        |             |             |
|----------------------------------------|-------------|--------|-------------|--------|-------------|--------|-------------|--------|-------------|-------------|
| Hemoglobin (g/dL)                      | 9.8±1.4     | 0.060  | 9.9±1.4     | 0.082  | 9.4±0.9     | 0.029* | 9.9±1.4     | 0.058  | 10.4±2.4    | 10.1±2.0    |
| Albumin (g/dL)                         | 2.9±1.0     | 0.932  | 2.7±1.0     | 0.043* | 2.7±0.6     | 0.253  | 2.8±1.0     | 0.897  | 2.9±0.4     | 2.9±0.7     |
| BUN (mg/dL)                            |             | 0.003* |             | 0.001* |             | 0.009* |             | 0.000* |             |             |
| Available number                       | 72 (92.3%)  |        | 70 (90.9%)  |        | 13 (86.7%)  |        | 90 (91.8%)  |        | 76 (85.4%)  | 166 (88.8%) |
| Mean±SD                                | 48.0±41.5   |        | 51.6±42.8   |        | 79.5±54.9   |        | 51.1±42.3   |        | 31.5±20.0   | 42.1±35.3   |
| Creatinine (mg/dL)                     | 1.8±1.7     | 0.009* | 1.6±1.6     | 0.025* | 1.8±1.6     | 0.134  | 1.7±1.6     | 0.006* | 1.2±1.0     | 1.5±1.4     |
| pH                                     | 7.5±0.1     | 0.051  | 7.5±0.1     | 0.060  | 7.5±0.0     | 0.352  | 7.5±0.1     | 0.079  | 7.5±0.1     | 7.5±0.1     |
| PaCO2 (mmHg)                           | 39.7±8.8    | 0.029* | 39.2±9.1    | 0.073  | 40.6±11.7   | 0.248  | 39.3±8.9    | 0.049* | 36.8±7.7    | 38.1±8.4    |
| PaO2/FiO2 ratio                        | 292.6±154.6 | 0.695  | 286.2±150.2 | 0.512  | 290.0±142.4 | 0.786  | 291.0±150.9 | 0.623  | 302.4±165.5 | 296.4±157.7 |
| CHOL (mg/dL)                           |             | 0.009* |             | 0.001* |             | 0.011* |             | 0.002* |             |             |
| Available number                       | 76 (97.4%)  |        | 76 (98.7%)  |        | 15 (100%)   |        | 96 (98.0%)  |        | 88 (98.9%)  | 184 (98.4%) |
| Mean±SD                                | 122.8±35.5  |        | 118.9±36.9  |        | 110.6±32.0  |        | 120.9±36.5  |        | 138.6±39.7  | 129.3±39.0  |
| Prealbumin (g/L)                       |             | 0.040* |             | 0.011* |             | 0.004* |             | 0.018* |             |             |
| Available number                       | 77 (98.7%)  |        | 76 (98.7%)  |        | 15 (100%)   |        | 97 (99.0%)  |        | 89 (100%)   | 186 (99.5%) |
| Mean±SD                                | 0.1±0.1     |        | 0.1±0.1     |        | 0.1±0.1     |        | 0.1±0.1     |        | 0.2±0.1     | 0.2±0.1     |
| COPD medications                       |             |        |             |        |             |        |             |        |             |             |
| Use of systemic steroids               | 0 (0.0%)    | NA     | 0 (0.0%)    | NA     | 0 (0.0%)    | NA     | 0 (0.0%)    | NA     | 0 (0.0%)    | 0 (0.0%)    |
| Use of short-acting bronchodilators    | 78 (100%)   | NA     | 77 (100%)   | NA     | 15 (100%)   | NA     | 98 (100%)   | NA     | 89 (100%)   | 187 (100%)  |
| RSI**                                  |             | 0.852  |             | 0.998  |             | 0.435  |             | 0.923  |             |             |
| Available number                       | 47 (60.3%)  |        | 41 (53.2%)  |        | 5 (33.3%)   |        | 55 (56.1%)  |        | 54 (60.7%)  | 109 (58.3%) |
| Mean±SD                                | 158.4±129.9 |        | 153.6±133.3 |        | 200.4±134.3 |        | 156.0±126.3 |        | 153.6±126.7 | 154.8±125.9 |
| Artificial airway                      |             | 0.586  |             | 0.758  |             | 0.991  |             | 0.862  |             |             |
| Tracheostomy                           | 54 (69.2%)  |        | 52 (67.5%)  |        | 9 (60.0%)   |        | 65 (66.3%)  |        | 57 (64.0%)  | 122 (65.2%) |
| Endotracheal tube                      | 24 (30.8%)  |        | 25 (32.5%)  |        | 6 (40.0%)   |        | 33 (33.7%)  |        | 32 (36.0%)  | 64 (34.8%)  |
| Ventilator settings                    |             |        |             |        |             |        |             |        |             |             |
| Mode                                   |             | 1.000  |             | 0.793  |             | 0.225  |             | 0.679  |             |             |
| Volume control                         | 55 (70.5%)  |        | 56 (72.7%)  |        | 13 (86.7%)  |        | 72 (73.5%)  |        | 62 (69.7%)  | 134 (71.7%) |
| Pressure control                       | 23 (29.5%)  |        | 21 (27.3%)  |        | 2 (13.3%)   |        | 26 (26.5%)  |        | 27 (30.3%)  | 53 (28.3%)  |
| Tidal volume (ml/kg)                   | 9.7±0.7     | 0.755  | 9.7±0.7     | 0.413  | 9.9±0.5     | 0.599  | 9.7±0.7     | 0.675  | 9.8±0.6     | 9.8±0.7     |
| Respiratory rate (breaths per minute)  | 17.3±1.0    | 0.141  | 17.2±1.0    | 0.470  | 17.3±1.0    | 0.323  | 17.3±1.0    | 0.150  | 17.1±1.0    | 17.2±1.0    |
| Minute ventilation (liters per minute) |             | 0.489  |             | 0.278  |             | 0.385  |             | 0.519  |             |             |
| Available number                       | 38 (48.7%)  |        | 32 (41.6%)  |        | 4 (26.7%)   |        | 45 (45.9%)  |        | 45 (50.6%)  | 90 (48.1%)  |

|                                                                               |            |       |            |        |           |       |            |        |            |            |
|-------------------------------------------------------------------------------|------------|-------|------------|--------|-----------|-------|------------|--------|------------|------------|
| Mean±SD                                                                       | 7.6±3.7    |       | 8.0±3.7    |        | 8.7±5.1   |       | 7.6±3.0    |        | 7.1±3.4    | 7.3±3.5    |
| Use of NIPPV after successful liberation from IMV support during the RCC stay | 28 (35.9%) | 0.082 | 32 (41.6%) | 0.013* | 5 (33.3%) | 0.348 | 37 (37.8%) | 0.035* | 20 (22.5%) | 57 (30.5%) |

\*p<0.05 when compared to Individuals without any adverse outcomes.

&Positive bronchodilator test was defined as FEV 1 or FVC improvement from pre-dose value by  $\geq 12\%$  and  $\geq 200$  mL.

#Modified GCS, verbal score as one.

\*RSI was defined as the ratio of respiratory frequency to tidal volume (breaths/minute/liter).

Abbreviations: see Supplementary Table S1.
